# Supplementary material for: Swelling induced debonding of thin hydrogel films grafted on silicon substrates
Source: Royal Society of Chemistry journal article supplement (doi:10.1039/d3sm00490b), 2023-01-01

Supplementary Information, Augustine *et al*

## Videos of delamination of PDMA hydrogel films from patterned strips with low adhesion.

All the videos were obtained with a film 700 nm in thickness and a swelling ratio  $S = 2.5$ .

### 1 SL10um.AVI

Debonding from a strip defects 10  $\mu m$  in width. The real time duration of the video is 357 s. The observed pattern corresponds to the classical telephone-cord blistering mechanism.

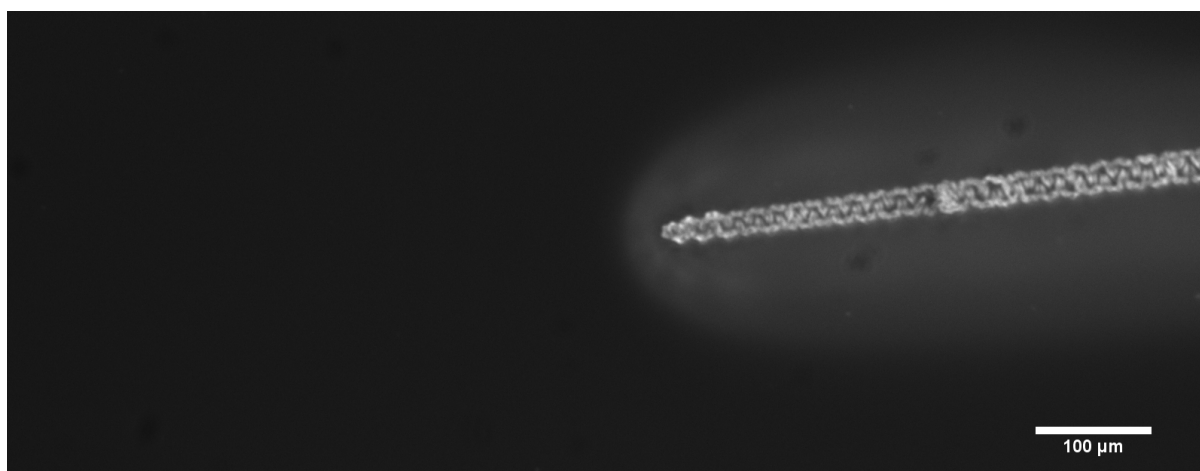

## 2 SL<sub>50um</sub>.AVI

Debonding from a strip defects  $50\ \mu\text{m}$  in width. The real time duration of the video is 380 s. Here, two separate phone cord patterns are observed to propagate on each side of the delaminated strip.

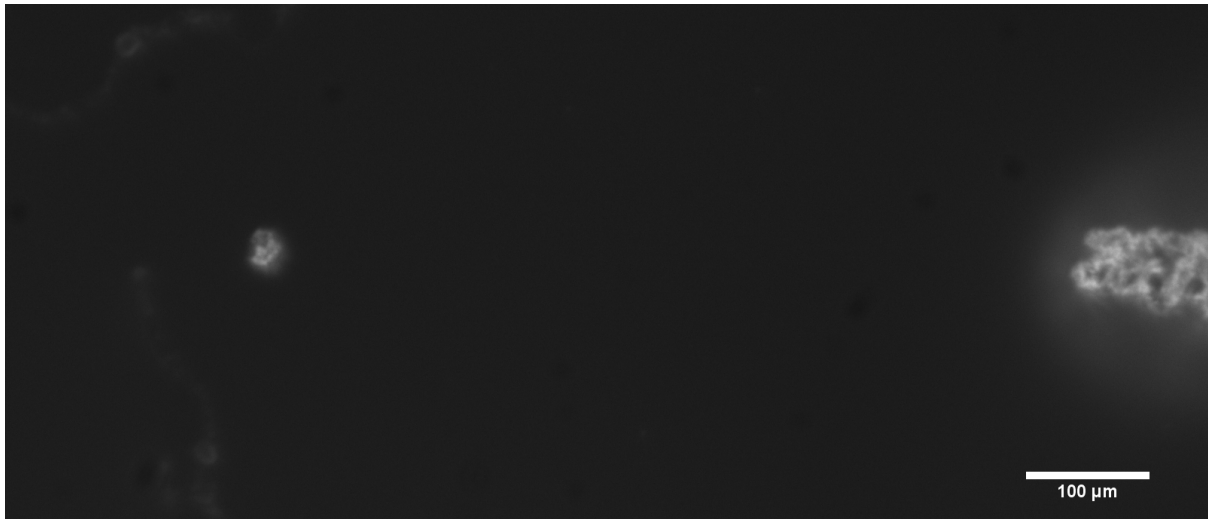

## 3 SL<sub>100um</sub>.AVI

Debonding from a strip defects  $100\ \mu\text{m}$  in width. The real time duration of the video is 110 s. Extensive folding of the film is observed.

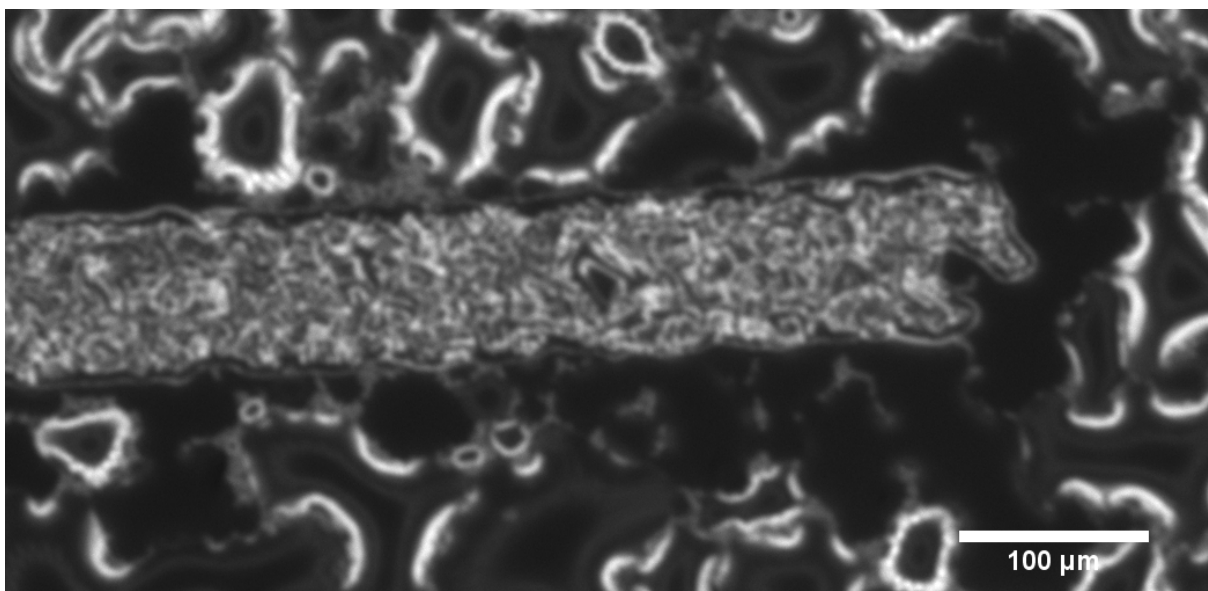

Supplement: d3sm00490b4.pdf [file d3sm00490b4.pdf]
